# Supplementary material for: A high performance perovskite CH3NH3PbCl3 single crystal photodetector: benefiting from an evolutionary preparation process
Source: Royal Society of Chemistry journal article supplement (doi:10.1039/c9tc00892f), 2019-01-01
Supplement: c9tc00892f1.pdf [file c9tc00892f1.pdf]

## Supporting Information

# High Performance Perovskite $\text{CH}_3\text{NH}_3\text{PbCl}_3$ Single Crystal Photodetector: Benefiting from Evolutionary Preparation Process

Zhishuai Yuan<sup>a</sup>, Wei Huang<sup>b</sup>, Shoutao Ma<sup>a</sup>, Gang Ouyang<sup>c</sup>, Wei Hu<sup>\*b</sup>, Wei Zhang<sup>\*a</sup>

*a* College of Chemistry and Chemical Engineering, Northeast Petroleum University, Daqing 163318, China. E-mail: ruoqiwei@sina.com

*b* School of Physics and Electronics, Hunan University, Changsha 410082, China. E-mail: huwei@hnu.edu.cn

*c* Key Laboratory of Low Dimensional Quantum Structures and Quantum Control of Ministry of Education, Hunan Normal University, Changsha 410081, China. E-mail: gangouy@hunnu.edu.cn

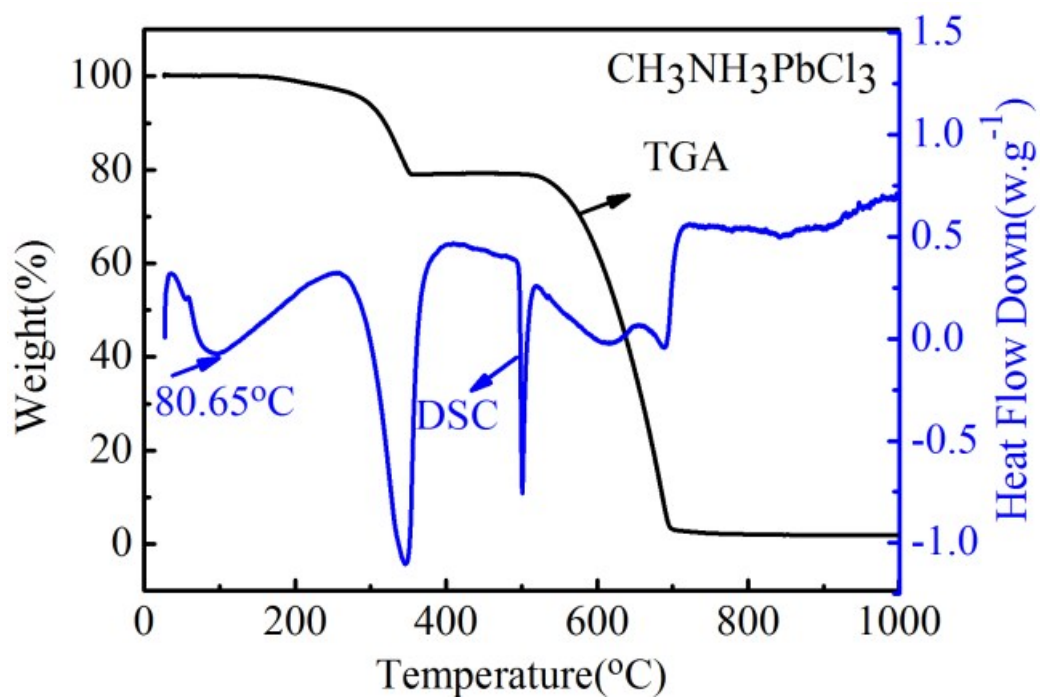

**Figure S1.** TGA-DSC curves of  $\text{CH}_3\text{NH}_3\text{PbCl}_3$  single crystal

In order to learn about the thermal stability of  $\text{CH}_3\text{NH}_3\text{PbCl}_3$  single crystal, differential scanning calorimetry/thermogravimetric analysis (DSC/TGA) was employed, which was carried out under nitrogen flow from room temperature to 1000°C. (Figure S1)

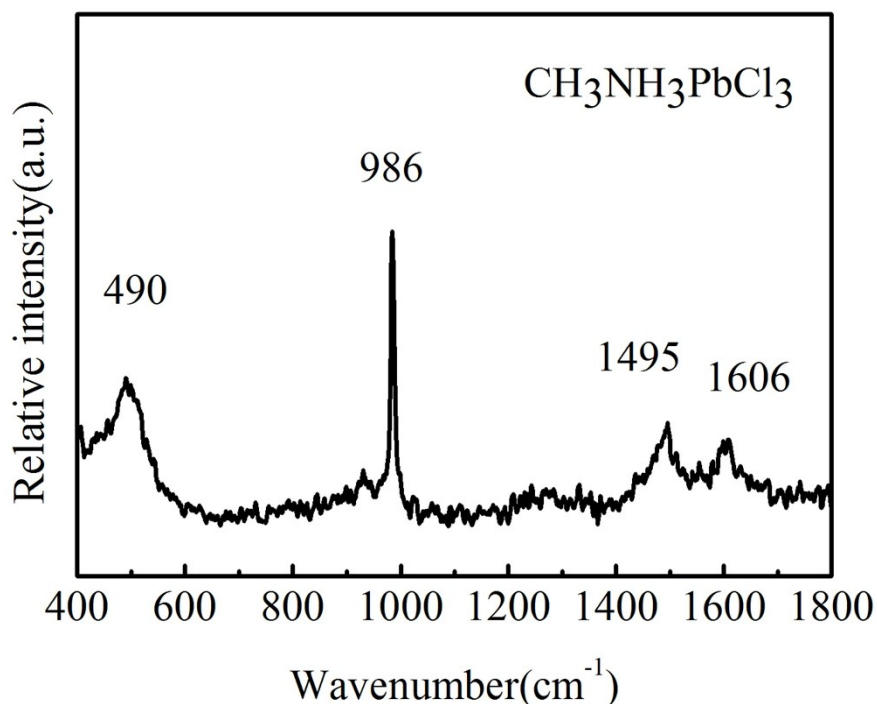

**Figure S2.** Raman spectrum of CH3NH3PbCl3 single crystal

As shown in Figure S2, the Raman spectrum was carried out under resonant conditions whose excitation wavelength was 633 nm. A series of intense Raman bands were exhibited precisely. Notably, two intense vibrational mode center bands located around 490 and 986  $\text{cm}^{-1}$ , which can attribute to the orientation motion of organic cations( $\text{MA}^+$ ), among them, the 490 $\text{cm}^{-1}$  peak was caused by N-H bending, while the peak of 986  $\text{cm}^{-1}$  was attributed to C-N bending. As for another two bands, one was located around 1495 $\text{cm}^{-1}$ , and another was around 1606 $\text{cm}^{-1}$ . In fact, these two peaks were caused by different factors. The bonding of C-H bond can account for the 1495 $\text{cm}^{-1}$  peak, nevertheless, the 1606 $\text{cm}^{-1}$  peak can attribute to the stretching of C-N bond.

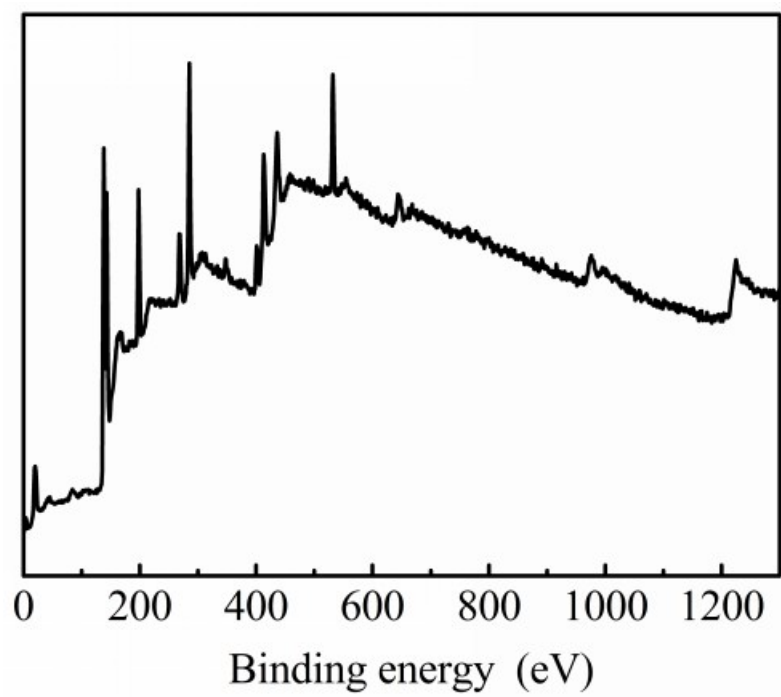

**Figure S3.** XPS spectrum of  $\text{CH}_3\text{NH}_3\text{PbCl}_3$  single crystal

**Table S1.** The quantity and average size of  $\text{CH}_3\text{NH}_3\text{PbCl}_3$  single crystals prepared under different temperatures.

| <i>Temperature(°C)</i> | <i>Quantity(num)</i> | <i>Average size(mm<sup>2</sup>)</i> |
|------------------------|----------------------|-------------------------------------|
| 60                     | 0                    | 0                                   |
| 70                     | 2                    | 22.75                               |
| 80                     | 21                   | 6.21                                |
| 100                    | 41                   | 2.66                                |
| 120                    | 94                   | 1.09                                |

**Table S2.** The performance comparison of similar perovskitephotodetectors employing single crystals, thin films, and nanocrystals reported in the literatures.

| <i>References</i> | <i>Materials</i>                                                               | <i>Responsivity</i>       | <i>Response time (rise/fall time)</i> | <i>On/Off ratio</i> |
|-------------------|--------------------------------------------------------------------------------|---------------------------|---------------------------------------|---------------------|
| 1                 | CH <sub>3</sub> NH <sub>3</sub> PbCl <sub>3</sub><br>(Single Crystal)          | 46.9mA/W<br>@-15V (365nm) | 24ms/62ms                             | 1.1×10 <sup>3</sup> |
| 2                 | CH <sub>3</sub> NH <sub>3</sub> PbCl <sub>3</sub><br>(Single Crystal)          | 0.60mA/W@10V<br>(405nm)   | _____                                 | 111                 |
| 3                 | CH <sub>3</sub> NH <sub>3</sub> PbCl <sub>3</sub><br>(thin film)               | 7.56A/W@4V (360nm)        | 170μs/220μs                           | 64                  |
| 4                 | CH <sub>3</sub> NH <sub>3</sub> PbCl <sub>3</sub><br>(thin film)               | 0.047A/W@0V (398nm)       | _____                                 | 9840                |
| 5                 | CH <sub>3</sub> NH <sub>3</sub> PbCl <sub>3</sub><br>(thin film)               | 297μA/W@10V<br>(367±2nm)  | _____                                 | _____               |
| 6                 | CH <sub>3</sub> NH <sub>3</sub> PbI <sub>3-x</sub> Cl <sub>x</sub> (thin film) | 620A/W@-0.7V (550nm)      | ~100ms                                | _____               |
| 7                 | CH <sub>3</sub> NH <sub>3</sub> PbI <sub>3-x</sub> Cl <sub>x</sub> (thin film) | 7.85A/W@10V (254nm)       | 0.2μs/0.7μs                           | 2235                |
| 8                 | CsPbCl <sub>3</sub> (nanocrystal)                                              | 1.89A/W@5V (365nm)        | 41ms/43ms                             | 10 <sup>3</sup>     |
| 9                 | CsPbCl <sub>3</sub> (nanocrystal)                                              | 0.9A/W@5V (365nm)         | 47ms/52ms                             | 1.9×10 <sup>3</sup> |
| Ours              | CH <sub>3</sub> NH <sub>3</sub> PbCl <sub>3</sub><br>(Single Crystal)          | 7.97A/W@1V (350nm)        | 1.27ms/1.84ms                         | 10 <sup>3</sup>     |

## References

- 1 G. Maculan, A. D. Sheikh, A. L. Abdelhady, M. I. Saidaminov, M. A. Haque, M. Banavoth, E. Alarousu, O. F. Mohammed, T. Wu and O. M. Bakr, *J. Phys. Chem. Lett.*, 2015, **6**, 3781.
- 2 X. H. Cheng, L. Jing, Y. Zhao, S. J. Du, J. X. Ding and T. L. Zhou, *J. Mater. Chem. C.*, 2018, **6**, 1579.
- 3 W. Z. Wang, H. T. Xu, J. Cai, J. B. Zhu, C. W. Ni, F. Hong, Z. B. Fang, F. Z. Xu, S. W. Cui, R. Xu, L. J. Wang, F. Xu and J. Huang, *Opt. Express.*, 2016, **8**, 8411.
- 4 E. Zheng, B. Yuh, G. A. Tosado and Q. M. Yu, *J. Mater. Chem. C.*, 2017, **5**, 3796.
- 5 L. Xiao, J. C. Luan, X. L. Yu, B. Zhang, S. Y. Dai and J. X. Yao, *Mater. Lett.*, 2018, **220**, 108.
- 6 H. W. Chen, N. Sakai, A. K. Jena, Y. Sanehira, M. Ikegami, K. C. Ho and T. Miyasaka, *J. Phys. Chem. Lett.*, 2015, **6**, 1773.
- 7 Y. L. Guo, C. Liu, H. Tanaka and E. Nakamura, *J. Phys. Chem. Lett.*, 2015, **6**, 535.
- 8 J. R. Zhang, Q. Wang, X. S. Zhang, J. X. Jiang, Z. F. Gao, Z. W. Jin and S. Z. Liu, *RSC. Adv.*, 2017, **7**, 36722.
- 9 D. Y. Li, D. L. Zhou, X. Chen, G. C. Pan, X. Y. Zhou, N. Ding and H. W. Song, *Adv. Funct. Mater.*, 2018, **28**, 1804429.
